# AutoRELACS: Automated Generation And Analysis Of Ultra-parallel ChIP-seq

*Arrigoni L.<sup>1</sup>, Ferrari F.<sup>1,2</sup>, Weller J.<sup>1</sup>, Bella C.<sup>1</sup>, Bönisch U.<sup>1</sup>, Manke T.<sup>1</sup>*

## AFFILIATIONS

<sup>1</sup> Max Planck Institute of Immunobiology and Epigenetics, Freiburg, Germany;

<sup>2</sup> Faculty of Biology, University of Freiburg, Freiburg, Germany;

## ABSTRACT

Chromatin immunoprecipitation followed by sequencing (ChIP-seq) is a method used to profile protein-DNA interactions genome-wide. RELACS (Restriction Enzyme-based Labeling of Chromatin *in Situ*) is a recently developed ChIP-seq protocol that deploys a chromatin barcoding strategy to enable standardized and high-throughput generation of ChIP-seq data. The manual implementation of RELACS is constrained by human processivity in both data generation and data analysis. To overcome these limitations, we have developed AutoRELACS, an automated implementation of the RELACS protocol using the liquid handler Biomek i7 workstation. We match the unprecedented processivity in data generation allowed by AutoRELACS with the automated computation pipelines offered by snakePipes. In doing so, we build a continuous workflow that streamlines epigenetic profiling, from sample collection to biological interpretation. Here, we show that AutoRELACS successfully automates chromatin barcode integration, and is able to generate high-quality ChIP-seq data comparable with the standards of the manual protocol, also for limited amounts of biological samples.

## 26 **BACKGROUND**

27 Chromatin immunoprecipitation followed by sequencing (ChIP-seq) is a widely used method to  
28 study protein-DNA interactions genome-wide (1). Despite the enormous contribution that ChIP-  
29 seq has brought to our understanding of epigenetic and transcriptional control, the traditional ChIP-  
30 seq protocol (2,3) presents various limitations. For example, it requires substantial amounts of  
31 biological input material, which is often a limiting factor in relevant clinical settings, and it is low-  
32 throughput, which prevents comprehensive epigenetic profiling. Furthermore, the protocol is  
33 poorly standardized across cell types, resulting in a high degree of technical variability that  
34 hampers biological interpretation of the data.

35

36 Over the last ten years, much work has been devoted to address these and other shortcomings (4–  
37 8). In line with these efforts, we have recently developed RELACS (Restriction Enzyme-based  
38 Labeling of Chromatin *in Situ*), a method that employs chromatin barcoding to enable high-  
39 throughput generation of ChIP-seq experiments (9). RELACS works reliably with low input  
40 material and can be used for quantitative ChIP-seq analysis (9,10). The method is highly  
41 standardized, and could potentially be scaled to profile hundreds of samples in parallel for tens of  
42 DNA-binding proteins at once. Yet, the current manual implementation is limited by human  
43 processivity in both data generation and data analysis.

44

45 To match the ideal potential of this methodology, we have implemented an automated version of  
46 the RELACS protocol, named AutoRELACS, using the liquid handler Biomek i7 automated  
47 workstation (Beckman Coulter). While other automated ChIP-seq implementations already exist  
48 (11,12), they still require a large amount of sample material, and they do not utilize the enormous

49 multiplexing potential of barcoded chromatin. The scope of these methods is limited to data  
50 generation and lack an integrated bioinformatics workflow that streamlines standard  
51 computational tasks (e.g. QC, DNA-mapping, peak calling). AutoRELACS, on the other hand,  
52 couples the high-throughput generation of ChIP-seq data with the scalable and modular  
53 computational pipelines offered by snakePipes (13). From version 1.2.3, snakePipes' DNA-  
54 mapping routine can handle RELACS data by performing demultiplexing of fastq files on  
55 RELACS adaptors and UMI-based deduplication. Together, AutoRELACS and snakePipes build  
56 a continuous workflow that automates ChIP-seq data generation and analysis, allowing for  
57 unprecedented processivity.

58

59 In this work, we test the performance of AutoRELACS by assessing 1) the scalability of the  
60 chromatin barcode integration step, 2) the quality of the generated data in comparison to the  
61 benchmark set by the manual protocol, and 3) the sensitivity of the automated method when  
62 working with low ( $\leq 25.000$  cells/sample) and very low ( $\leq 5.000$  cells/sample) cell numbers. We  
63 show that AutoRELACS is a scalable method that can generate high quality ChIP-seq data,  
64 comparable with the standards of the manual protocol. We finally show that AutoRELACS  
65 provides reliable epigenetic profiling also with limited input biological material.

66

## 67 **MAIN**

68 **AutoRELACS is a scalable method for the generation and analysis of ultra-parallelized**  
69 **ChIP-seq data**

70 RELACS (Restriction Enzyme-based Labeling of Chromatin *in Situ*) is a method that enables the  
71 high-throughput generation of ChIP-seq experiments (9). To increase the standardization and the

72 scalability of this approach, we have developed AutoRELACS, an automated implementation of  
73 the RELACS protocol using the liquid handler Biomek i7.

74

75 The AutoRELACS workflow is conceptually divided in six parts: four fully automated (A)  
76 processes intermitted by two manual (M) steps (Fig 1a). First, cells are manually processed to  
77 isolate the nuclei (14) and to digest the chromatin within the nuclear envelope (step 1 - M). Next,  
78 using the liquid handler Biomek i7, the chromatin from each sample is barcoded and pooled into  
79 a unique masterbatch (step 2 - A). Using focused sonication, nuclei are lysed and the barcoded  
80 chromatin is released (step 3 - M). The final three steps of the protocol have been fully automated  
81 and require minimal human supervision. These include the chromatin immunoprecipitation (ChIP)  
82 reactions and washing steps of beads-bound immunocomplexes (step 4 - A), decrosslinking, DNA  
83 purification and PCR amplification (step 5 - A) and, after sequencing, barcode demultiplexing and  
84 bioinformatics analysis with snakePipes (step 6 -A) (13).

85

86 The integration of sample-specific RELACS barcodes into the digested chromatin (Fig 1a, step 2)  
87 is key to the success of the method. To test the performance of automated and parallelized  
88 RELACS barcode integration, 60 custom barcodes were designed, each composed of a 4  
89 nucleotide (nt)-long unique molecular identifier (UMI), followed by a 8 nt-long barcode with 50%  
90 GC content (note that after combining forward and reverse reads, each fragment is tagged by a 8-  
91 nt long UMI). These adaptors were used to label the chromatin of 60 batches of S2 cells  
92 (*Drosophila melanogaster*) in duplicates using the Biomek i7 workstation (Fig 1b). Results show  
93 that all barcodes are present within the pooled chromatin in both replicates, with a distribution of

94 barcode representation equal to  $1.64\% \pm 0.22\%$  and  $1.64\% \pm 0.35\%$  for replicate 1 and 2  
95 respectively, close to the uniform expectation of 1.667 % (Fig 1b, dashed line).

96

97 In summary, we show that AutoRELACS can be used to uniformly integrate multiple barcodes in  
98 a fully automated fashion, allowing for ultra-parallelized processing of a considerable number of  
99 samples in one single run.

100

### 101 **The quality of AutoRELACS ChIP-seq data is comparable with manual RELACS**

102 Next, we test the quality of the ChIP-seq data generated with AutoRELACS and we compare it  
103 with the results from the previously published manual RELACS protocol. To this end, we run in  
104 parallel a manual and an automated RELACS experiment where we digest and barcode 28 batches  
105 of S2 cells and we immunoprecipitate against H3K4me3, H3K27ac and H3K27me3.

106

107 The histone modification profiles generated with manual RELACS and with AutoRELACS are  
108 overall similar. The variance present in the first two principal components of the normalized  
109 coverage matrix (computed on the merged peaks set) discriminates between the three histone  
110 modifications, regardless of the method used (Fig 2a). Comparison of the metaprofiles of the  
111 merged scores over peaks shows identical signal for H3K4me3, while H3K27ac and H3K27me3  
112 present a slightly lower median coverage in AutoRELACS compared to the manual procedure (Fig  
113 2b). Nevertheless, these differences do not impinge on the sensitivity of the assay. Visual  
114 inspection of the normalized coverage reveals high similarity between the two RELACS  
115 implementations (Fig 2c), while high overlap (80-90%) is observed between the peaks called in  
116 the two datasets (Fig S1a).

117

118 To provide a global overview for all enriched regions, we cluster ( $k=5$ ) the signal of H3K4me3,  
119 H3K27ac and H3K27me3 using the manual and the automated RELACS data on a common  
120 merged peaks set (Fig 2d). We do not observe any set of peaks that are specific to manual RELACS  
121 or AutoRELACS, which shows no obvious implementation-specific biases.

122

123 Together, we show that AutoRELACS yields high quality ChIP-seq data that are overall  
124 comparable with the manual RELACS protocol.

125

### 126 **AutoRELACS works reliably with low cell numbers**

127 RELACS can generate robust epigenetic profiling with low cell numbers (9). To test the sensitivity  
128 limits of AutoRELACS, we barcode 4 batches of HepG2 cells and we aliquote the chromatin into  
129 two pools containing 4 x 15,000 and 4 x 75,000 cells respectively. We name the former “Very  
130 Low” and the latter “Low” chromatin pool. Next, we divide each chromatin pool into three equal  
131 aliquotes for immunoprecipitation against H3K4me3, H3K27ac and H3K27me3, while a small  
132 fraction of each pool ( $\sim 1 \mu\text{l}$ ) is set aside as Input control. This setup results in three ChIP reactions  
133 with 5000 cells/barcode for the “Very Low” pool and three ChIP reactions with 25,000  
134 cells/barcode for the “Low” pool (Fig 3a).

135

136 The normalized genome-wide coverages coming from Low and Very Low experiments are highly  
137 correlated within histone modifications groups, which indicates that the profiles generated with  
138 different amounts of input material are overall similar (Fig 3b). Although we observe a

139 deterioration of the signal-to-noise ratio in the Very Low group, the enrichment is preserved and,  
140 for narrow euchromatic marks, this is sufficient for robust peak calling (Fig 3c).

141  
142 In summary, we show that AutoRELACS can be deployed for automated and parallelized profiling  
143 of protein-DNA interactions genome-wide also for limited amounts of biological samples.

144

## 145 **DISCUSSION**

146 In this work we present AutoRELACS, an automated implementation of the RELACS protocol (9)  
147 that enables the automated high-throughput generation of ChIP-seq experiments. AutoRELACS  
148 natively interfaces with the computational pipelines offered by snakePipes (13), thus streamlining  
149 the generation and analysis of DNA-binding profiles at unprecedented scale.

150

151 RELACS can parallelize ChIP-seq data generation through *in situ* ligation of sample-specific  
152 barcodes into the digested chromatin inside the nuclear envelope. Here, we show that  
153 AutoRELACS successfully integrates a high number of barcodes in parallel, ensuring a balanced  
154 representation of each adaptor in the final chromatin pool. While we limit our test to 60 barcodes,  
155 a single AutoRELACS experiment can support the integration of up to 96 barcodes. The resulting  
156 chromatin pool can be split into 96 ChIP reactions, leading to the generation of up to 9,216  
157 independent chromatin profiles in only three days. It should be noted that more imbalanced  
158 barcode distributions within the final chromatin pool may still lead to a successful profiling, at the  
159 cost of increasing the total sequencing depth. It is therefore suggested to perform a preliminary  
160 shallow sequencing of the chromatin input to estimate the total sequencing depth needed to ensure  
161 a minimum coverage for all samples.

162

163 We further show that AutoRELACS can generate high quality ChIP-seq data, comparable with the  
164 standards of the manual implementation, and that the method can be used for epigenetic profiling  
165 of low cell numbers. Together, these features suggest AutoRELACS as a method of choice in  
166 various clinical applications, potentially enabling comprehensive screening of epigenetic markers  
167 from small amounts of biological material.

168

169 The current AutoRELACS implementation has room for further improvements. To date, the  
170 method still requires human intervention in the earliest stages of the protocol. Future developments  
171 might integrate the use of focused sonicator platforms into the workflow of the liquid handler  
172 workstation, to further reduce user intervention and enable a full walk-away automated solution.

173

## 174 **MATERIALS AND METHODS**

175

### 176 **Cell culture**

177 S2 cells were cultured in Express Five SFM (Thermo Fisher Scientific) supplemented with  
178 glutamax, at 27 °C and were provided by Akhtar's lab (MPI-IE). HepG2 liver hepatocellular  
179 carcinoma (ATCC, HB-8065TM) were cultured in Eagle's minimal essential medium (EMEM,  
180 Lonza, 06-174) supplemented with 10% fetal bovine serum (Sigma), 2 mM L-glutamine (Lonza),  
181 1.8 mM CaCl<sub>2</sub>, 1 mM sodium pyruvate (Lonza) and penicillin–streptomycin mixture (100  
182 units/mL, Lonza), at 37 °C at 5% CO<sub>2</sub> in 10 cm plates, up to 70%-80% confluency.

183

184



## 185 **Cell fixation**

186 HepG2 and S2 cells were fixed in 1% methanol-free formaldehyde (Thermo Scientific, 28906) in  
187 D-MEM (for HepG2 cells) or Express Five SFM (for S2 cells) for 15 min at room temperature  
188 under gentle shaking. Formaldehyde was quenched for 5 min by adding 125 mM glycine final  
189 concentration. Cells were rinsed twice with ice-cold PBS, harvested by scraping (HepG2) and  
190 pelleted (300 g, 10 min, 4 °C).

191

## 192 **Detailed AutoRELACS workflow**

193 The AutoRELACS protocol is divided into five main steps (as described in Fig. 1).

194 A separated program file is provided for each automated section and is available for download at

195 [https://github.com/FrancescoFerrari88/AutoRELACS/tree/master/AutoRELACS\\_binaries Biom](https://github.com/FrancescoFerrari88/AutoRELACS/tree/master/AutoRELACS_binaries_Biom)

196 [ek\\_i7](#).

197

198 1) ***Nuclei extraction and chromatin digestion*** (manual protocol): nuclei are extracted from fixed  
199 cells, swollen, digested, washed and counted as previously described (9). The resulting digested  
200 nuclei are resuspended in 10 mM Tris-HCl pH 8 at the nuclei density of 500,000 nuclei/25 µl  
201 (Drosophila S2) and 500,000 nuclei/25 µl (HepG2) for the following nuclei barcoding step.

202

203 2) ***Chromatin barcoding and pooling*** (automated, method file “RELACS barcoding.bmf”): in this  
204 step chromatin is barcoded inside the nuclei as previously described (9), but using automation.

205 This method allows the processing for a flexible number of nuclei samples, from 1 to 96.

206 Preparation of reagents: nuclei samples are aliquoted column-wise in a 96-wells PCR plate (25 µl  
207 of digested nuclei per well), named “Nuclei Plate”. 2 µl of the desired RELACS barcode at 15 µM

208 are aliquoted in each well of a second 96-wells PCR plate, following the same coordinates of the  
209 respective nuclei aliquot (named “Index Plate”). The following reagent mixes are positioned into  
210 1.5 ml conical tubes on the Biomek deck in a cold Peltier block: End Repair mix (ER), Ligation  
211 mix (LIG) and 3M NaCl, following directions as highlighted in the “guided instrument setup” (a  
212 screenshot of the deck is shown in Supplementary Fig. 2a).

213 Steps of the “RELACS barcoding” program: 5  $\mu$ l of ER mix are added into each occupied well of  
214 “Nuclei Plate”. The plate is mixed on the orbital shaker present on the deck and incubated into the  
215 integrated PCR cycler for 30 min at 20 °C and for 5 min at 65 °C. End-repaired nuclei are  
216 transferred from “Nuclei Plate” to the “Index Plate” containing RELACS barcodes. 15.5  $\mu$ l of LIG  
217 mix are added into each occupied well. The “IndexPlate” is shaken and transferred into the  
218 integrated PCR cycler for ligation incubation (15 min at 30 °C and for 15 min at 20 °C). The  
219 ligation is inactivated adding 5  $\mu$ l of 3M NaCl into each occupied well of “Index Plate”. The plate  
220 is shaken and pooling is automatically performed by transferring samples from each occupied well  
221 of “Index Plate” to 1.5 ml tubes positioned into the “Final Pool” rack. Wells containing barcoded  
222 nuclei can be pooled as specified by the user, by indicating source and destination coordinates of  
223 “Index Plate” and “Final Pool” into the .csv file “Nuclei\_Pooling\_Template.csv”.

224

225 3) ***Sonication-assisted nuclei lysis*** (manual protocol): tubes containing nuclei pools are manually  
226 collected. Barcoded nuclei are pelleted down (5000 g for 10 min). Supernatants are discarded and  
227 pellets are resuspended into the desired volume of Shearing buffer supplemented with Protease  
228 Inhibitor Cocktail (Roche, 11873580001) and sonicated for 5 minutes in a Covaris E220 sonicator  
229 as described (9).

230

231 4) **ChIP and elution** (automated, method file “RELACS ChIP-Elution.bmf”). The method allows  
232 for a flexible number of ChIP reactions from 1 to 96 simultaneously. A screenshot of the overall  
233 organization of the deck is shown in Supplementary Fig. 2b.

234 All reagents used and the procedure of ChIP largely overlap to the ones described in our former  
235 publication (9), with the relevant modifications highlighted here below. Preparation of ChIP plate  
236 (named “Sample Plate”): ChIP reactions are carried out in a maximum volume of 150  $\mu$ l instead  
237 of 200  $\mu$ l used for manual RELACS. 75  $\mu$ l of chromatin prepared in step 3 are aliquoted column-  
238 wise into a 1.2 ml storage plate (Thermo Fisher, AB1127) accordingly to the required number of  
239 ChIP. To equilibrate salts and detergents, 73  $\mu$ l of 1X buffer iC1 (from iDeal ChIP-seq kit for  
240 histones, Diagenode C01010173) supplemented with Protease Inhibitor Cocktail (Roche,  
241 11873580001) and 2  $\mu$ l of 5M NaCl are added into each chromatin well. One  $\mu$ g per 100,000 cells  
242 of the desired antibody (H3K4me3 C15410003, H3K27ac C15410196, H3K27me3 C15410195,  
243 all from Diagenode) is added into each well. Remaining chromatins are set aside at 4 °C to prepare  
244 inputs. Please notice that input samples will be manually added later on before the automated  
245 decrosslinking step.

246 Preparation of reagents: ChIP Wash buffers 1 to 4 (from iDeal ChIP-seq kit for histones,  
247 Diagenode C01010173) are aliquoted into quarter module reservoirs divided by length. ChIP  
248 elution buffer (1% SDS, 200 mM NaCl, 10 mM Tris-HCl pH 8, 1 mM EDTA) is also aliquoted  
249 into the remaining well of the reservoir as highlighted in the “guided instrument setup”. ChIP beads  
250 (Dynabeads protein A-conjugated magnetic beads, Invitrogen) are washed twice with 1X buffer  
251 iC1 and aliquoted into two 1.5 ml conical tubes before placing them on the deck.

252 Automated protocol: the program involves four main steps (antibody incubation, beads incubation,  
253 ChIP washes, elution). Antibody incubation is performed by shaking the “Sample Plate”

254 containing the ChIP reactions on the orbital shaker, repeating this procedure 12 times: 20 min  
255 continuous shaking at 500 rpm, stop for 10 min. In comparison to manual RELACS we carried out  
256 ChIP incubation for a total time of 6 hours at room temperature instead of 10 hours at 4 °C as used  
257 in manual RELACS. Please notice that we did this modification to overcome technical constraints  
258 that would have resulted in loss of samples when mixing by pipetting.

259 Beads incubation: beads placed on the deck are automatically mixed and 15 µl of beads are  
260 dispensed into each ChIP reaction. “Sample Plate” is then transferred on the orbital shaker and  
261 mixed for a total time of 2 hours at room temperature (5 min continuous shaking at 500 rpm, stop  
262 for 5 min, repeated 12 times). In comparison to the procedure used for manual RELACS, beads  
263 incubation time for AutoRELACS has been reduced by one hour.

264 ChIP washes: the following procedure is repeated for each of the four wash buffers. “Sample Plate”  
265 is transferred onto the magnetic rack and left for 5 minutes to reclaim the beads-bound  
266 immunocomplexes to the magnet. Supernatants are aspirated, discarded into the wash station, and  
267 150 µl of wash buffer are added into each occupied well. Plate is shaken on the orbital shaker for  
268 about 5 minutes to wash the beads (5 seconds pulse shaking at 800 rpm for 60 times).

269 Elution: the last wash supernatants are removed from the beads. 80 µl of ChIP elution buffer is  
270 added to the beads and the plate is shaken on the orbital shaker for a total time of about 35 minutes  
271 (5 seconds pulse shaking at 800 rpm for 60 times, 4 minutes pause, for four times). “Sample Plate”  
272 is placed onto the magnet for 5 minutes and supernatants containing immunoprecipitated material  
273 are collected into a fresh 96-well plate (called “ChIP Eluates”) and stored overnight into the  
274 integrated PCR cycler at 10 °C.

275

276 5) ***Decrosslink, purification, USER treatment, PCR amplification*** (automated, method file  
277 “RELACS Decrosslink-FinalLibrary.bmf”): the plate “ChIP Eluates” is collected from the Biomek  
278 and Input samples are manually added column-wise after the ChIP samples (0.1-10% of the  
279 original chromatin volume in 80  $\mu$ l of ChIP Elution buffer). This plate is placed back onto the deck  
280 and renamed in the instrument setup as “Sample Plate 2”.

281 Reagent preparation: 4  $\mu$ l of 10  $\mu$ M Illumina dual index primer cocktails (from IDT) are placed in  
282 a 96-well PCR plate column-wise following the desired pattern corresponding to the ChIP samples  
283 (plate is named “Index Plate”). The following reagents are required for this section of program, as  
284 specified in the instrument setup (Supplementary Fig. 2c): 100% isopropanol, EB (10 mM Tris-  
285 HCl pH 8), freshly prepared 85% ethanol (all on the deck at room temperature), proteinase K 20  
286 mg/ml (Thermo Fisher, EO0491), glycogen 20 mg/mg (Thermo Fisher, R0561), carboxylated  
287 magnetic beads (Invitrogen, 65011), PCR mix (NEBNext Ultra II Q5 Master mix, NEB M0544),  
288 USER enzyme (NEB M5505), all placed in 1.5 ml conical tubes in a cold Peltier block. Ampure  
289 XP (Beckman Coulter, A63881) are thoroughly mixed and aliquoted column-wise according to  
290 the pattern of “Sample Plate 2” in a 96-well storage plate (AB0765, Thermo Fisher), using 100  $\mu$ l  
291 of beads per well.

292 Automated Decrosslink: 2  $\mu$ l of proteinase K are transferred into each occupied well of “Sample  
293 Plate 2” containing ChIP eluates and input samples. The plate is mixed on the orbital shaker and  
294 incubated for 2 hours at 65  $^{\circ}$ C into the integrated PCR cycler.

295 Automated DNA purification: in comparison to manual RELACS, in which decrosslinked DNA  
296 is purified using columns (Qiagen minElute PCR purification kit), AutoRELACS uses a custom-  
297 made DNA purification by precipitation and sequestration using carboxylated magnetic beads.  
298 Decrosslinked samples are transferred from the PCR plate to a larger 96-well storage plate (“ChIP

299 Purification”, 4titude, LB0125). The following reagents are added into each occupied well: 2  $\mu$ l of  
300 glycogen, 10  $\mu$ l of carboxylated beads (automatically pre-mixed by pipetting before dispensing),  
301 and 80  $\mu$ l of isopropanol. The plate “ChIP Purification” is mixed by shaking and incubated at room  
302 temperature for 10 minutes. The beads are reclaimed onto the integrated magnet for 5 minutes and  
303 supernatants are discarded. DNA bound to beads is washed twice using 200  $\mu$ l of 85% ethanol.  
304 Beads are dried and DNA is automatically eluted by addition of 28  $\mu$ l of EB into each occupied  
305 well. Plate is placed onto the magnet to discard the beads and to collect purified eluates.

306 USER treatment: 27  $\mu$ l of purified DNAs are collected into a fresh 96-well PCR plate. 3  $\mu$ l of  
307 USER enzyme is added into each occupied well. Plate is shaken and incubated into the integrated  
308 PCR cycler for 15 minutes at 37 °C. Samples are transferred into a 96-well storage plate for  
309 purification using Ampure XP (0.9X ratio). After purification, samples are eluted in 22  $\mu$ l of EB.

310 Automated amplification of final libraries and purification: 21  $\mu$ l of each purified DNA are  
311 transferred to the 96-well PCR plate containing Illumina indexes (“Index Plate”). 25  $\mu$ l of PCR  
312 mix are added into each occupied well and the plate is shaken. The plate is then transferred into  
313 the integrated PCR cycler for PCR incubation (hot start 98 °C for 30 sec; PCR cycles: 98 °C for  
314 10 sec, 65 °C for 75 sec; final extension 65 °C for 5 min). Notice that before launching the method  
315 the user has the possibility of choosing the number of PCR cycles to use (10, 12 or 14). In the  
316 experiments presented in this work libraries were amplified using 12 PCR cycles (14 PCR cycles  
317 for low input ChIP). Amplified samples are transferred into a 96-well storage plate for double  
318 purification using Ampure XP (first at 0.8X ratio second at 1X ratio). Ready libraries are eluted in  
319 25  $\mu$ l of EB and transferred in a clean 96-well PCR plate.

320

321

## 322 Sequencing

323 Libraries were quality-controlled to check the concentration (Qubit DNA HS, Invitrogen, Q32851)  
324 and the fragment size distribution (Fragment Analyzer capillary electrophoresis, NGS 1-6000 bp  
325 hs DNA kit). Libraries were pooled and normalized to 1 to 2 nM with 10% PhiX spike-in according  
326 to the Illumina guidelines. Libraries were clustered on NovaSeq XP flowcells and sequenced  
327 paired-end with a read length of 50 bp on an Illumina NovaSeq 6000 instrument.

328

## 329 Bioinformatics analysis

330 BCL files were converted to fastq format using bcl2fastq2 (v. 2.20.0) and demultiplexed on  
331 illumina barcodes. Fastq files were used as input to snakePipes' DNA-mapping and ChIP-seq  
332 workflows (v. 1.2.3) (13), using default parameters as listed in  
333 [https://github.com/FrancescoFerrari88/AutoRELACS/tree/master/snakePipes\\_defaults](https://github.com/FrancescoFerrari88/AutoRELACS/tree/master/snakePipes_defaults). Mapping  
334 was performed on the genome build dm6 and hg38 for *D. melanogaster* and *H. sapiens*  
335 respectively. Briefly, fastq files were demultiplexed on RELACS adaptor barcodes and reads were  
336 mapped to the reference genome using Bowtie2 (v. 2.3) (15). Uniquely mapping read pairs (mapq  
337 > 3) were retained and duplicates were filtered on UMI using UMITools (paired mode) (v. 1.0.0)  
338 (16). Peaks were called using MACS2 (v. 2.1.2) (17) with default parameters. Merged peak sets  
339 were obtained by concatenating, sorting and merging peaks identified in the different experimental  
340 conditions included in the analysis, using bedtools sort | merge (v. 2.28) (18).  
341 Clustered heatmaps, ChIP-seq metaprofiles and the clustered correlations heatmap were generated  
342 using deeptools (v. 3.3.1) (19), using filtered bam files as input. Principal component analysis (Fig  
343 2a) was performed using the Python library scikit-learn (v. 0.19.1) on rlog-transformed count

344 matrix (20). Coverage was obtained using deeptools' multiBamSummary (v. 3.3.1) (19) on the  
345 merged peak set. We use pyGenomeTracks (21) to visualize signal tracks on specific genomic loci.

346

### 347 **Data and code availability**

348 The fully reproducible and documented analysis is available on github at  
349 <https://github.com/FrancescoFerrari88/AutoRELACS>, as Jupyter notebooks and R/python scripts.

350 Raw data and normalized bigWig tracks were deposited to GEO and are available for download  
351 using the following accession number: GSE147042.

352

### 353 **ACKNOWLEDGEMENTS**

354 We would like to thank Alexiadis Anastasios for providing the S2 cells, and Erez Dror for technical  
355 support. This work was funded by the Deutsche Forschungsgemeinschaft - Project ID 192904750  
356 - CRC 992 Medical Epigenetics.

357

### 358 **SUPPLEMENTARY**

359

#### 360 **Biomek i7 requirements and consumables for automation**

361 The following instrument parts are required to perform AutoRELACS on the Biomek i7: Biomek  
362 i7 Workstation equipped with left and right pods; 1200 µl 96-multichannel (left pod), Span-8 pipets  
363 coupled with 1 ml syringe volume (right pod), gripper tools (one per pod), static Peltier with tube  
364 block for conical tubes, shaking Peltier and block for 96-well PCR plates, Orbital shaker, Wash  
365 station for multichannel, Wash station for Span-8, Magnet, Peristaltic pump (Masterflex L/S, Cole-  
366 Parmer), Automated PCR cycler (Thermo Fisher), seven Tip Loading Stations, twenty-six



367 Automated Labware Positioners. Deck configuration details are indicated into each respective  
368 protocol part (Supplementary Fig. 2). Instrument configuration file is provided in the  
369 supplementary material (Biomeki7.bif).

370 The following plastic consumables are used for automation: Hard-Shell 96-well PCR plates  
371 (HSP9601, Bio-Rad), 96-Deep well storage microplates (4titude, LB0125), Low profile 1.2 ml  
372 square storage plate (AB1127, Thermo Fisher), 0.8 ml 96-well storage plate (AB0765, Thermo  
373 Fisher), Auto-sealing plate lids (MSL2022, Bio-Rad), Universal microplate lid (4ti-0290, 4titude),  
374 300 ml reservoir (EK-2035, Agilent technologies), Modular reservoir quarter module divided by  
375 length (372788, Beckman Coulter), Modular reservoir quarter module (372790, Beckman  
376 Coulter), sterile tips with filter (all from Beckman Coulter): 1025  $\mu$ l (B85955), 190  $\mu$ l (B85911),  
377 50  $\mu$ l (B85888).

378

## 379 **FIGURE LEGENDS**

380

### 381 **Figure 1: AutoRELACS workflow ensures comprehensive integration of RELACS barcodes**

382 a) Overview of AutoRELACS protocol. 1-M) Nuclei of formaldehyde-fixed cells are extracted  
383 manually using adjusted ultrasound (14). The nuclear envelope is permeabilized, and the  
384 chromatin digested *in situ* using a 4-cutter restriction enzyme (RE). 2-A) Digested chromatin from  
385 each sample is automatically barcoded. Upon completion, the liquid handler pools all barcoded  
386 samples into a unique tube (Biomek i7 program: “RELACS\_Barcoding”). 3-M) Pooled samples  
387 are collected by the user and nuclei are lysed using focused sonication. 4-A) The barcoded  
388 chromatin is aliquoted according to the number of required immunoprecipitation (IP) reactions  
389 into corresponding ChIP reaction mixes. The ChIP reactions are carried out overnight in parallel

390 at room temperature on the Biomek i7 workstation. Upon completion, the ChIP-ped chromatin is  
391 sequestered using beads and automatically washed 4 times at increasing stringency conditions and  
392 finally eluted in the elution buffer (Biomek program: “RELACS\_ChIP\_Elution”). 5-A)  
393 Subsequently, the eluted chromatin is decrosslinked and the DNA is purified. DNA is amplified  
394 via PCR using primers carrying Illumina dual indexes. Optionally, the liquid handler performs  
395 multiple rounds of purification and size selection using Ampure XP beads (Biomek program:  
396 “RELACS\_Decrosslink\_FinalLibraries”). A: Automated; M: Manual.

397 6-A) Libraries are sequenced on Illumina’s sequencing devices. Upon completion of the  
398 sequencing run, bcl2 files are automatically converted to fastq format and input into the fully  
399 automated ChIP-seq workflow available as part of the snakePipes suite (13). SnakePipes’ ChIP-  
400 seq workflow performs demultiplexing of reads on RELACS custom barcodes, quality controls,  
401 mapping and filtering of duplicate reads using unique molecular identifiers (UMI), and further  
402 downstream analysis like generation of input-normalized coverage tracks and peak calling.

403 b) Distribution of RELACS barcodes in two independent input chromatin pools. 60 barcodes are  
404 integrated into the digested chromatin of two independent batches of S2 cells. Sequencing of the  
405 input chromatin pool for replicate 1 (upper panel) and replicate 2 (lower panel), reveals the  
406 percentage of input reads for each barcode used (y-axis). The ideal uniform distribution (100/60)  
407 is represented as a dotted line. The shaded gray area shows one standard deviation from the mean  
408 of the observed distribution.

409

410

411

412 **Figure 2: AutoRELACS ChIP-seq data are comparable with the standards of the manual**  
413 **protocol.**

414 a) Principal component analysis (PCA) of the normalized coverage matrix computed on the  
415 merged peak set between H3K4me3, H3K27ac and H3K27me3, as generated by AutoRELACS  
416 (Automated) and manual RELACS (Manual). For each mark and protocol implementation, all 28  
417 demultiplexed technical replicates are shown. The 10000 most variable loci across all marks are  
418 input into the PCA.

419 b) Metaprofile of the median normalized coverage computed over H3K4me3 (upper panel),  
420 H3K27ac (central panel) and H3K27me3 (lower panel) peaks. Each panel shows the signal  
421 generated with AutoRELACS and manual RELACS from a merge of all 28 technical replicates.

422 c) Data tracks of the merged signal of the 28 technical replicates for H3K4me3 (red), H3K27ac  
423 (green), H3K27me3 (grey) and Input (cyan) on the dm6 locus chr2R:7,400,000-7,700,000. For  
424 each mark, we show the profile generated by AutoRELACS (Automated) and manual RELACS  
425 (Manual) and the merged set of peaks called in the two datasets (Merged Peaks).

426 d) Heatmaps showing the clustered signal (k=5) on a merged set of peaks, as identified in the  
427 AutoRELACS (Automated) and in the manual RELACS (Manual) dataset, for H3K4me3 (left  
428 panel), H3K27ac (central panel) and H3K27me3 (right panel). The similarity between each pair  
429 of tracks indicates that there are no obvious implementation-specific biases.

430

431 **Figure 3: AutoRELACS works with low cell numbers**

432 a) Overview of the experimental design used to test the sensitivity limits of AutoRELACS. Four  
433 batches of HepG2 cells are barcoded and pooled into two chromatin masterbatches, the first  
434 comprising 4 \* 15,000 cells (Very Low input) and the second 4 \* 75'000 cells (Low Input). Each

435 chromatin pool is evenly split into three ChIP reactions (H3K4me3, H3K27ac, H3K27me3), while  
436 a small fraction (~ 1µl) is set aside as Input control. For the Very Low pool, about 20,000 cells are  
437 used in each ChIP, which corresponds to 5,000 cells/barcode. For the Low pool, about 100,000  
438 cells are used in each ChIP, which corresponds to 25,000 cells/barcode.

439 b) Hierarchical clustering of HepG2 ChIP-Seq profiles of H3K4me3, H3K27ac and H3K27me3,  
440 generated using Low and Very Low chromatin input, based on the pairwise Pearson Correlation  
441 Coefficient (PCC). Each pairwise PCC is computed based on the binned coverage (bin width = 10  
442 kb) over the whole genome.

443 c) Metaprofile of the mean enrichment over Input of H3K4me3 (upper panel, red), H3K27ac  
444 (central panel, green) and H3K27me3 (lower panel, grey), computed on a consensus set of peaks  
445 identified for each mark separately, from the Low and Very Low input chromatin.

446

447 **Supplementary Figure 1: peaks identified in AutoRELACS and RELACS datasets overlap**  
448 **to a great extent.**

449 a) Venn diagrams representing the percentage of overlapping peaks and implementation-specific  
450 peaks identified in AutoRELACS (Automated) and manual RELACS (Manual) datasets, for  
451 H3K4me3 (left panel), H3K27ac (central panel) and H3K27me3 (right panel) profiles of S2 cells.

452

453 **Supplementary Figure 2: Biomek i7 deck configurations for AutoRELACS.**

454 a) Deck configuration for the method “RELACS barcoding”. On the deck are present filtered tips  
455 in different volumes (50 µl violet box in position 1, 190 µl green boxes in position 4 and 5), PCR  
456 lid for automation (3), magnet (2) and Peltier block containing barcoding reagents at 4 °C (4 °C  
457 reagents, 6). Digested nuclei are aliquoted in a 96-well PCR plate (Nuclei plate, 7). RELACS

458 barcodes are aliquoted in a 96-well PCR plate (Index plate, 10) positioned on top of a cold Peltier.

459 To protect the indexes, a plastic lid is positioned on top of the plate.

460 b) Deck configuration for the method “RELACS ChIP-Elution”. On the deck are present filtered

461 tips in different volumes (190 µl green boxes in position 3, 4 and 5, 1025 µl orange box in position

462 6), PCR lid for automation (2), magnet (1) and Peltier block containing ChIP reagents at 4 °C (4

463 °C reagents, 8). Room temperature ChIP reagents are stored in reservoirs (ChIP-Wash reagents,

464 9). ChIP reactions are aliquoted in a 96-deep well storage plate (Sample plate, 10). Final ChIP

465 eluates are transferred into a 96-well PCR plate (ChIP eluates, 7).

466 c) Deck configuration for the method “RELACS Decrosslink-FinalLibrary”. On the deck are

467 present filtered tips in different volumes (50 µl violet boxes in position 1 8, 9, 190 µl green boxes

468 in position 4, 5, 7, 1025 µl orange boxes in position 6, 10), PCR lid for automation (3), magnet

469 (2) and Peltier block containing the required reagents at 4 °C (4 °C reagents, 18). Room

470 temperature reagents are stored in reservoirs (DNA purification reagents, 23). 85% Ethanol is

471 stored in a lidded reservoir (20). Ampure XP are aliquoted in a 96-deep well storage plate covered

472 with a lid (Ampure XP, 22). ChIP and PCR purification occur in 96-deep well plates (11, 15). 96-

473 well PCR plates in position 12, 16 and 17 are required for several steps of the method and to store

474 the final libraries. ChIP and Input samples, which need to be firstly decrosslinked, are positioned

475 in a 96-well PCR plate (24).

476

## 477 REFERENCES

478 1. Furey TS. ChIP-seq and beyond: new and improved methodologies to detect and characterize  
479 protein-DNA interactions. *Nat Rev Genet.* 2012 Dec;13(12):840–52.

480 2. Johnson DS, Mortazavi A, Myers RM, Wold B. Genome-wide mapping of in vivo protein-DNA  
481 interactions. *Science.* 2007 Jun 8;316(5830):1497–502.

482 3. Mikkelsen TS, Ku M, Jaffe DB, Issac B, Lieberman E, Giannoukos G, et al. Genome-wide maps of

- 483 chromatin state in pluripotent and lineage-committed cells. *Nature*. 2007 Aug 2;448(7153):553–60.
- 484 4. van Galen P, Viny AD, Ram O, Ryan RJH, Cotton MJ, Donohue L, et al. A Multiplexed System for  
485 Quantitative Comparisons of Chromatin Landscapes. *Mol Cell*. 2016 Jan 7;61(1):170–80.
- 486 5. Schmidl C, Rendeiro AF, Sheffield NC, Bock C. ChIPmentation: fast, robust, low-input ChIP-seq  
487 for histones and transcription factors. *Nat Methods*. 2015 Oct;12(10):963–5.
- 488 6. Brind'Amour J, Liu S, Hudson M, Chen C, Karimi MM, Lorincz MC. An ultra-low-input native  
489 ChIP-seq protocol for genome-wide profiling of rare cell populations. *Nat Commun*. 2015 Jan  
490 21;6:6033.
- 491 7. Shankaranarayanan P, Mendoza-Parra M-A, van Gool W, Trindade LM, Gronemeyer H. Single-tube  
492 linear DNA amplification for genome-wide studies using a few thousand cells. *Nat Protoc*. 2012 Jan  
493 26;7(2):328–38.
- 494 8. Chabbert CD, Adjalley SH, Klaus B, Fritsch ES, Gupta I, Pelechano V, et al. A high-throughput  
495 ChIP-Seq for large-scale chromatin studies. *Mol Syst Biol*. 2015 Jan 12;11(1):777.
- 496 9. Arrigoni L, Al-Hasani H, Ramírez F, Panzeri I, Ryan DP, Santacruz D, et al. RELACS nuclei  
497 barcoding enables high-throughput ChIP-seq. *Commun Biol*. 2018 Dec 5;1:214.
- 498 10. Ferrari F, Arrigoni L, Franz H, Butenko L, Trompouki E, Vogel T, et al. DOT1L Methyltransferase  
499 Activity Preserves SOX2-Enhancer Accessibility And Prevents Activation of Repressed Genes In  
500 Murine Stem Cells [Internet]. *bioRxiv*. 2020 [cited 2020 Feb 25]. p. 2020.02.03.931741. Available  
501 from: <https://www.biorxiv.org/content/10.1101/2020.02.03.931741v1>
- 502 11. Aldridge S, Watt S, Quail MA, Rayner T, Lukk M, Bimson MF, et al. AHT-ChIP-seq: a completely  
503 automated robotic protocol for high-throughput chromatin immunoprecipitation. *Genome Biol*. 2013  
504 Nov 7;14(11):R124.
- 505 12. Gasper WC, Marinov GK, Pauli-Behn F, Scott MT, Newberry K, DeSalvo G, et al. Fully automated  
506 high-throughput chromatin immunoprecipitation for ChIP-seq: identifying ChIP-quality p300  
507 monoclonal antibodies. *Sci Rep*. 2014 Jun 12;4:5152.
- 508 13. Bhardwaj V, Heyne S, Sikora K, Rabbani L, Rauer M, Kilpert F, et al. snakePipes: facilitating  
509 flexible, scalable and integrative epigenomic analysis. *Bioinformatics*. 2019 Nov 1;35(22):4757–9.
- 510 14. Arrigoni L, Richter AS, Betancourt E, Bruder K, Diehl S, Manke T, et al. Standardizing chromatin  
511 research: a simple and universal method for ChIP-seq. *Nucleic Acids Res*. 2016 Apr 20;44(7):e67.
- 512 15. Langmead B, Salzberg SL. Fast gapped-read alignment with Bowtie 2. *Nat Methods*. 2012 Mar  
513 4;9(4):357–9.
- 514 16. Smith T, Heger A, Sudbery I. UMI-tools: modeling sequencing errors in Unique Molecular  
515 Identifiers to improve quantification accuracy. *Genome Res*. 2017 Mar;27(3):491–9.
- 516 17. Zhang Y, Liu T, Meyer CA, Eeckhoute J, Johnson DS, Bernstein BE, et al. Model-based analysis of  
517 ChIP-Seq (MACS). *Genome Biol*. 2008 Sep 17;9(9):R137.
- 518 18. Quinlan AR, Hall IM. BEDTools: a flexible suite of utilities for comparing genomic features.  
519 *Bioinformatics*. 2010 Mar 15;26(6):841–2.

- 520 19. Ramírez F, Ryan DP, Grüning B, Bhardwaj V, Kilpert F, Richter AS, et al. deepTools2: a next  
521 generation web server for deep-sequencing data analysis. *Nucleic Acids Res.* 2016 Jul  
522 8;44(W1):W160–5.
- 523 20. Love MI, Huber W, Anders S. Moderated estimation of fold change and dispersion for RNA-seq  
524 data with DESeq2. *Genome Biol.* 2014;15(12):550.
- 525 21. Ramírez F, Bhardwaj V, Arrigoni L, Lam KC, Grüning BA, Villaveces J, et al. High-resolution  
526 TADs reveal DNA sequences underlying genome organization in flies. *Nat Commun.* 2018 Jan  
527 15;9(1):189.

# Figure 1

a

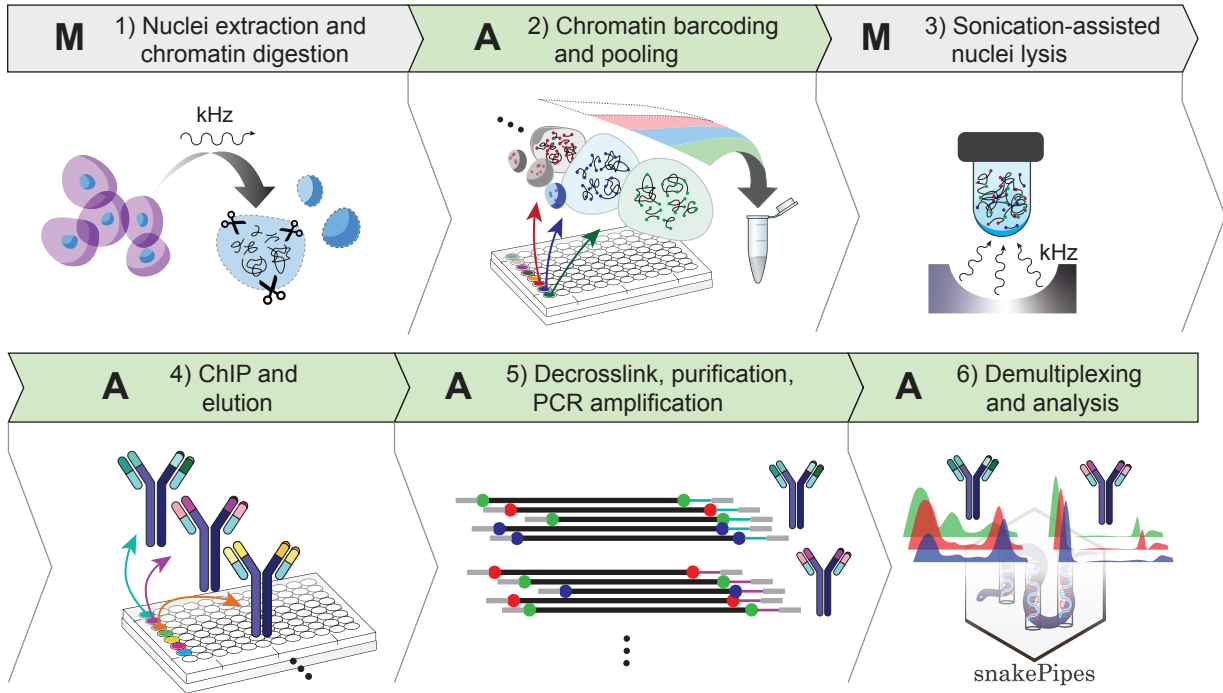

b

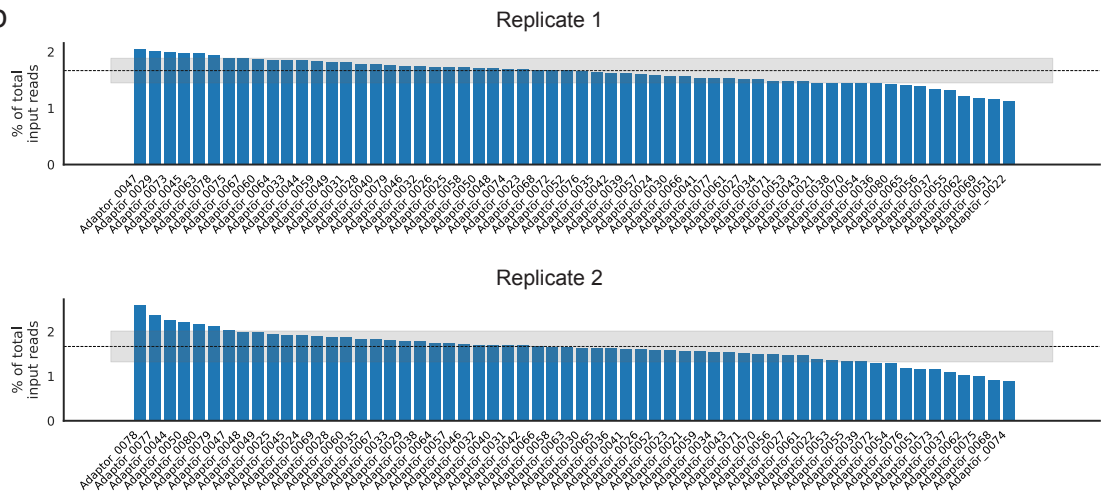



# Figure 2

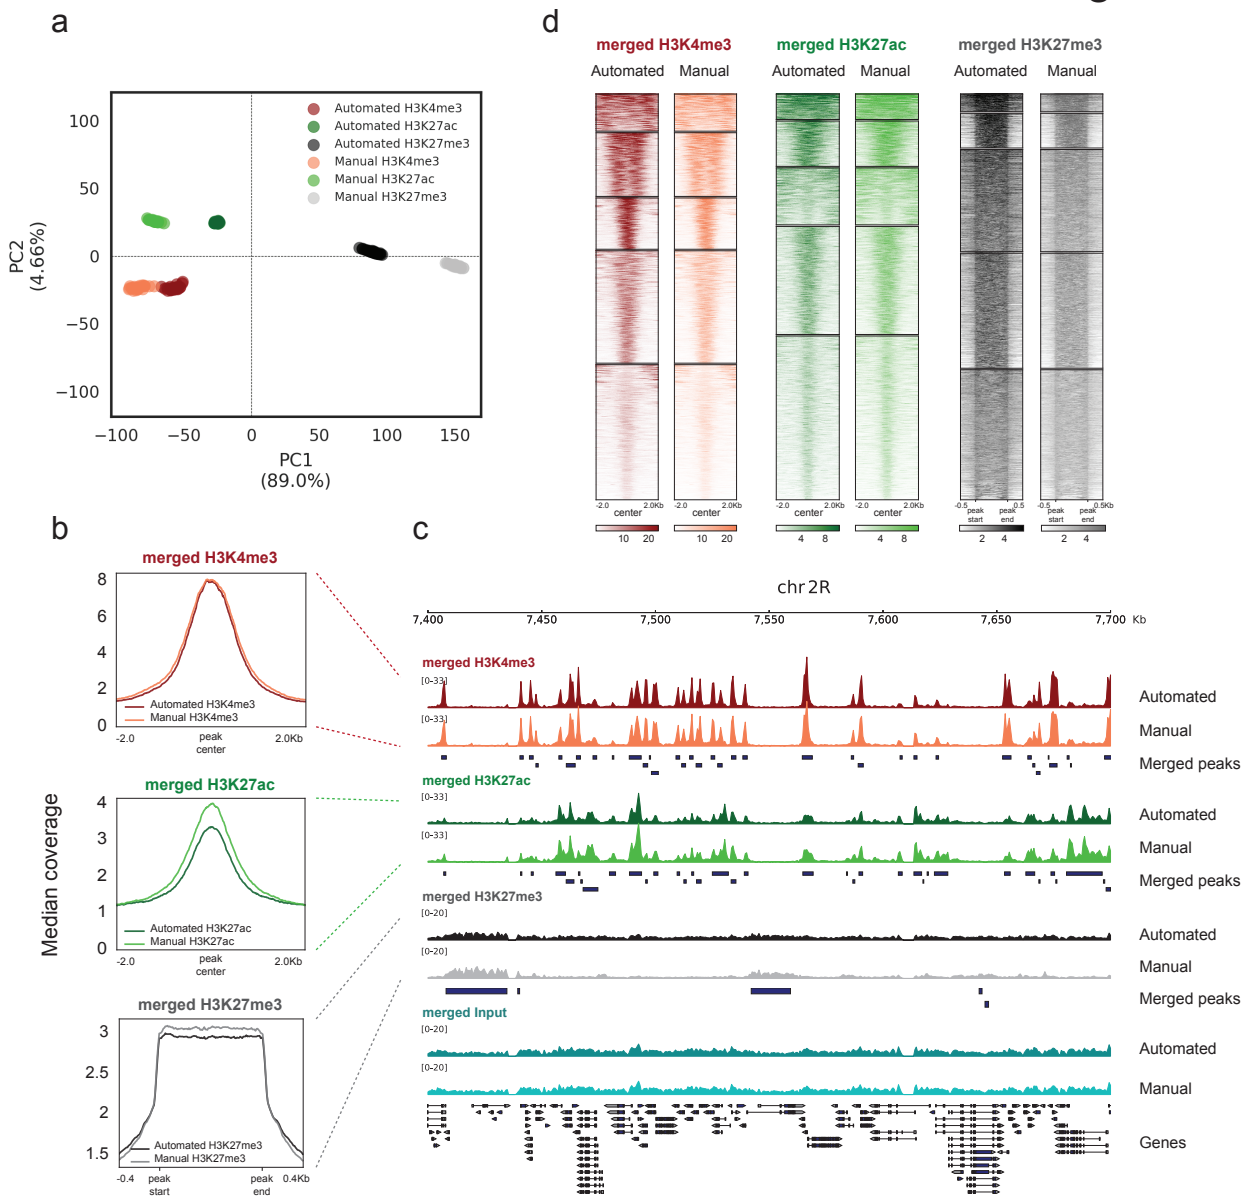

# Figure 3

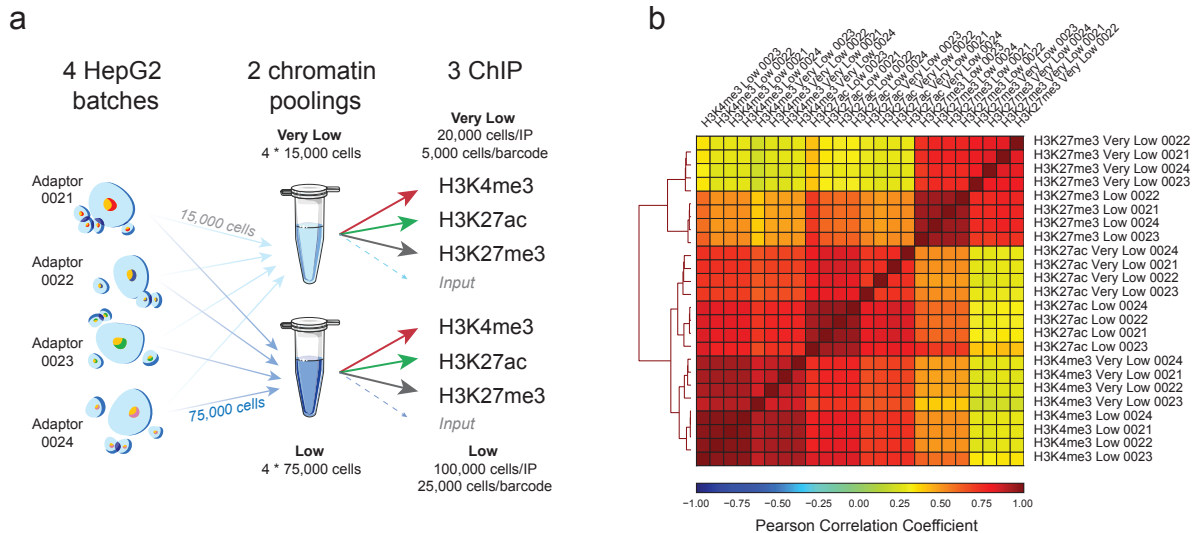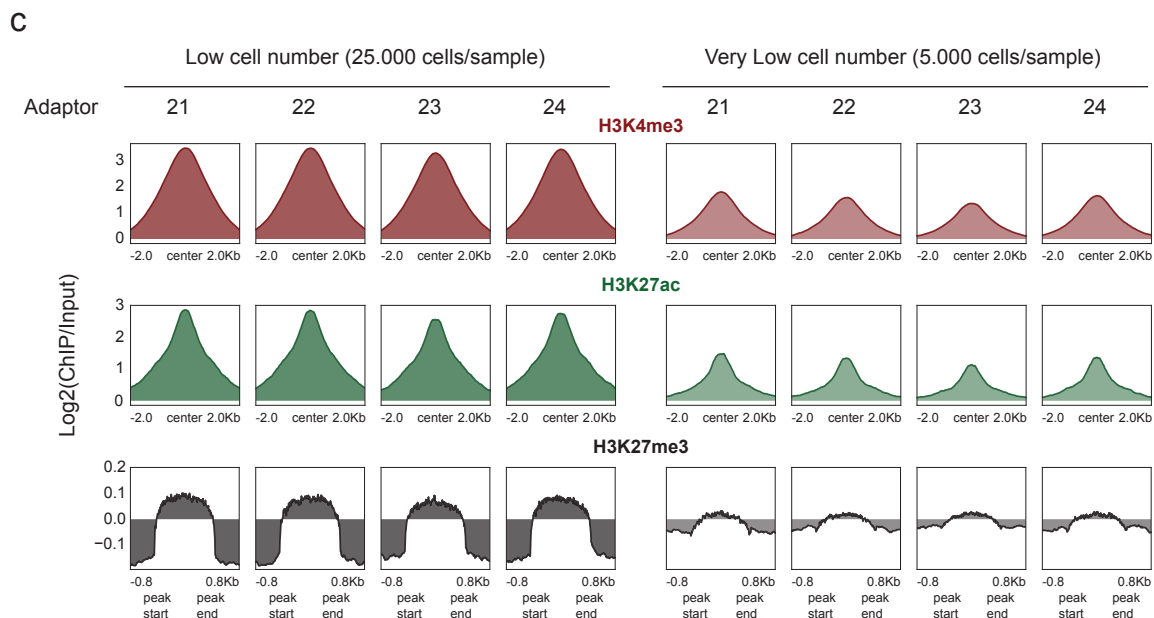

# Supplementary 1

a

**merged H3K4me3**

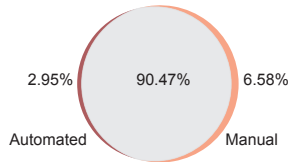

**merged H3K27ac**

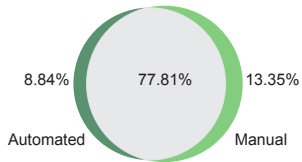

**merged H3K27me3**

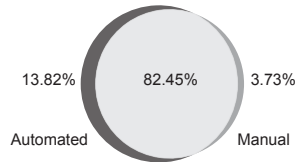

# Supplementary 2

a

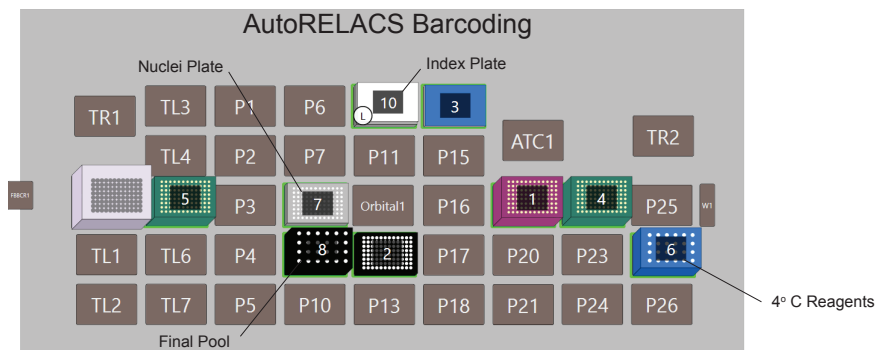

b

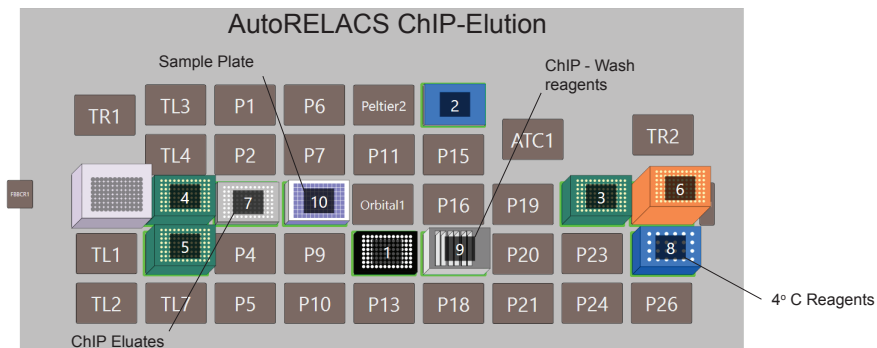

c

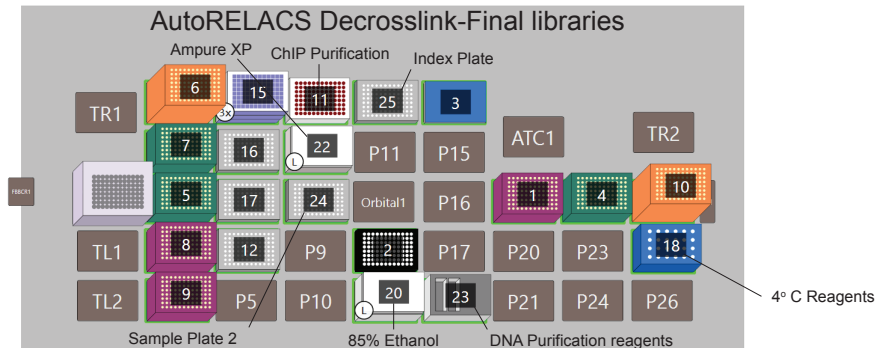

Source: https://www.biorxiv.org/content/10.1101/2020.03.30.016287v1.full.pdf
